# Supplementary material for: Far from boring: a new Grenvillian perspective on Mesoproterozoic tectonics
Source: Research Square preprint supplement (doi:10.21203/rs.3.rs-847663/v1), 2021-10-26
Supplement: Supplementary file 2 [file 94f32ea9fb165ba6568843ea.docx]

**Supplementary files**

**List of igneous suites of rocks used to construct figures 2 and 3.**

| Name of igneous suite | Cristallisation age | Geochemical affinity granitoid | Geochemical affinity mafic | Age Reference |
| --- | --- | --- | --- | --- |
| *Bourguet | 1038 Ma | Arc |  | Augland et al., 2015 |
| *Bouvreuil | 1006 Ma | Slab failure/ A-Type | mantle array | Augland et al., 2017 |
| *Core | 1014 Ma | Slab failure | mantle array | Augland et al., 2017 |
| *Rheaume | 985 Ma | A-type | MORB+subduction | Côté et al., 2018 |
| *Rodez | 995 Ma | Slab failure/ A-Type | MORB+subduction | Papapavlou, 2019 |
| *Okaopeo | 1014 Ma | Slab failure | mantle array | Augland et al., 2015 |
| *Sabot Mangerite | 1017 Ma | Slab failure/A-Type | mantle array | Gobeil et al., (2002) |
| *St-Hedwidge | 1017 Ma | Slab failure/A-type | mantle array | Papapavlou, 2019 |
| *Tremaudan | 1028 Ma | Slab failure | mantle array | Moukhsil *et al*., 2013a, Davis *et al*., 2015 |
| *Manic 5 | 1065 Ma | Arc | Andean | Dunning et Indares (2010) |
| Guenette | 1065 Ma | Arc/Slab failure |  | van Breemen & Corriveau 1995 |
| *Travers | 1076 Ma | Arc/ A-Type |  | Papapavlou et al., 2018 |
| Kensington-Skootamatt | 1080-1060 Ma | Arc | Andean | Corriveau et al., 2000; Corriveau et van Breeman, 2000 |
| *Argent | 1103 Ma | Arc | MORB + Subduction | Davis et al., 2015 |
| *Travers | 1076 Ma | Arc/A-type | Andean | Papapavlou et al., 2018 |
| Chevreuil Suite | 1160-65 Ma | Arc | MORB + Subduction | Corriveau et al., 2000; Corriveau et van Breeman, 2000 |
| *Tétépisca | 1050 Ma |  | Andean | Moukhsil *et al*., 2013b |
| *Louis | 1046 Ma |  | Andean | Moukhsil *et al*., 2009 |
| Vein complex | 1008 Ma |  | MORB+subduction | Maity, 2019 |
| *Roc | 1012 Ma |  | mantle array | Moukhsil et al., 2015 |
| * data from the MERN | |  |  |  |

*Complete reference list for compilation of igneous ages (U-Pb and TDM) used to as well as metamorphic ages used construct figures 2 and 3.*

Aleinikoff, J. N., Southworth, S., Merschat, A. J. Implications for late Grenvillian (Rigolet phase) construction of Rodinia using new U-Pb data from the Mars Hill terrane, Tennessee and North Carolina, United States. *Geology*. **41(10)**, 1087-1090 (2013)

Augland, L.E., Moukhsil, A., Solgadi, F. Mantle influence of syn- to late-Grenvillian alkaline magmatism in the Grenville Province: causes and implications. *Canadian Journal of Earth Sciences*, **54**: 263-277 (2017)

Augland, L.E., Moukhsil, A., Solgadi, F., Indares, A. Pinwarian to Grenvillian magmatic evolution in the central grenville province: New constraints from ID–TIMS U–Pb ages and coupled Lu–Hf S–MC–ICP–MS data. *Canadian Journal of Earth Sciences.* **52**, 701-721 (2015).

Bedard, J. Parental magmas of Grenville Province massif-type anorthosites, and conjectures about why massif anorthosites are restricted to the Proterozoic. *Earth and Environmental Science Transactions of the Royal Society of Edinburgh*. **100(1-2)**, 77-103 (2009)

Blein, O., La Flèche, M.R., Corriveau, L. Geochemistry of the granulitic Bondy gneiss complex: a 1.4 Ga arc in the Central Metasedimentary Belt, Grenville Province, Canada. *Precambrian Research*, **120**: 193-217. (2003)

Bonnet, A. N., Corriveau, L., La Flèche, M. R. Chemical imprint of highly metamorphosed volcanic-hosted hydrothermal alterations in the La Romaine Supracrustal Belt, eastern Grenville Province, Quebec. *Canadian Journal of Earth Sciences*. **42 (10)**, 1783-1814 (2005)

Chiarenzelli, J., Lupulescu, M., Thern, E. & Cousens, B. Tectonic implications of the discovery of a Shawinigan ophiolite (Pyrites Complex) in the Adirondack Lowlands. *Geosphere* **7**, 333–356 (2011).

Corfu, F. & Easton, R. M. Sharbot Lake terrane and its relationships to Frontenac terrane, Central Metasedimentary Belt, Grenville Province: New insights from U-Pb geochronology. *Can. J. Earth Sci.* **34**, 1239–1257 (1997).

Corriveau, L. Proterozoic subduction and terrane amalgamation in the southwestern Grenville province, Canada: Evidence from ultrapotassic to shoshonitic plutonism. *Geology*. **18**, 614-617 (1990).

Corriveau, L. Architecture de la ceinture métasédimentaire centrale au Québec, Province de Grenville: Un exemple de l'analyse de terrains de métamorphisme élevé. Ministère de l’Énergie et des Ressources naturelles, Québec; Bulletin Géologique 586 (2013)

Corriveau, L. & Van Breemen, O. Docking of the Central Metasedimentary Belt to Laurentia in geon 12: Evidence from the 1.17-1.16 Ga Chevreuil intrusive suite and host gneisses, Quebec. *Can. J. Earth Sci.* **37**, 253–269 (2000).

Côté, G., Moukhsil, A., Constantin, M. & David, J. Geochemical characterization, geochronology, and geodynamic implications of Grenville rare Earths bearing syenites, Haut-Saint-Maurice, QC, Canada. Minerals, 8, 336 (2018).

Davis, D. W., Moukhsil, A., Lafrance, I., Hammouche, H., Goutier, J., Pilote, P. & Talla-Takam, F. Datations U-Pb dans les provinces du Supérieur, de Churchill et de Grenville effectuées au JSGL en 2012-2013. MERN, RP2014-07 (2015)

Culshaw, N., Slagstad, T., Raistrick, M., Dostal, J. Geochemical, geochronological and isotopic constraints on the origin of members of the allochtonous Shawanaga and basal Parry Sound domains, Central Gneiss Belt, Grenville Province, Ontario. *Precambrian Research*, 228: 131-150. (2013)

Davis, D. W. & Green, J. C. Geochronology of the North American Midcontinent rift in western Lake Superior and implications for its geodynamic evolution. *Can. J. Earth Sci.* **34**, 476–488 (1997).

Dickin, A. P., McNutt, R. H., Martin, C. & Guo, A. The extent of juvenile crust in the Grenville Province: Nd isotope evidence. *Bull. Geol. Soc. Am.* **122**, 870–883 (2010).

Dickin, A. P. Crustal formation in the Grenville Province: Nd-isotope evidence. *Can. J. Earth Sci.* **37**, 165–181 (2000).

Dickin, A.P. and McNutt, R.H. The Central Metasedimentary Belt (Grenville Province) as a failed back-arc rift zone: Nd isotope evidence. *Earth Planet. Sci. Lett*., **259**, 97–106. (2007)

Dickin, A., Hynes, E., Strong, J., Wisborg, M. Testing a back-arc ‘aulacogen’ model for the Central Metasedimentary Belt of the Grenville Province. *Geol. Mag*. **153**, 681–695 (2016).

Dickin, A.P., Strong, J.W.D. Nd isotope mapping of the Grenvillian Allochthon Boundary Thrust in Algonquin Park, Ontario. *Can. J. Earth Sci*. **56**, 101–110. (2020)

Dunning, G. & Indares, A. New insights on the 1.7-1.0 Ga crustal evolution of the central Grenville Province from the Manicouagan – Baie-Comeau transect. Precambrian Research; 180, 204-226 (2010)

Easton, R. Geology and Mineral Potential of the Late Syenite Suite ( 1090 – 1030 Ma ) and Associated Rocks , Central Metasedimentary Belt Boundary Tectonic Zone , Grenville Province. *Ontario Geological Survey, Open File Report*. 12-1 to 12-12, **6290** (2012)

Easton, R. Project Unit 11-004 . Geology and Mineral Potential of the Brudenell Area , Northeastern Central Metasedimentary Belt , Grenville Province , with an Emphasis on the Syenitic Rocks. . *Ontario Geological Survey, Open File Report.* **1983**, (2012)

GobeilL, A.,Hebert, C., Clark, T., Beaumier, M. & Perreault, S. Géologie de la région du lac De La Blache (22K/03 et 22K/04). MERN, RG 2002-01 (2002).

Indares, A. & Martignole, J. Metamorphic constraints on the tectonic evolution of the allochthonous monocyclic belt of the Grenville Province, western Quebec. *Can. J. Earth Sci.* **27**, 371–386 (1990).

Indares, A., Dunning, G., Cox, R., Gale, D. & Connelly, J. High-pressure, high-temperature rocks from the base of thick continental crust: Geology and age constraints from the Manicouagan Imbricate Zone, easter Grenville Province. *Tectonics* **17**, 426–440 (1998).

Indares, A. Garnet-kyanite clinopvroxenites and garnet-kyanite restites from the manicouagan imbricate zone: A case of high-P - High-T metamorphism in the Grenville Province. *Canadian Mineralogist*. **35**, 1161-1171 (1997).

Indares, A. & Dunning, G. Coronitic metagabbro and eclogite from the Grenville Province of western Quebec: Interpretation of U-Pb geochronology and metamorphism. *Canadian Journal of Earth Sciences*. **34**, 891-901 (1997)

Indares, A., White, R. W. & Powell, R. Phase equilibria modelling of kyanite-bearing anatectic paragneisses from the central Grenville Province. *J. Metamorph. Geol.* **26**, 815–836 (2008).

Jamieson, R. A., Beaumont, C., Nguyen, M. H. & Culshaw, N. G. Synconvergent ductile flow in variable-strength continental crust: Numerical models with application to the western Grenville orogen. *Tectonics* **26**, 1–23 (2007).

Jannin, S., Gervais, F., Moukhsil, A. & Augland, L. E. Late-Grenvillian channel flow in the central Grenville Province (Manicouagan Reservoir area): New constraints from a structural and geochronological study of the Allochthon Boundary Thrust. *J. Struct. Geol.* **115**, 132–151 (2018).

Jannin, S., Gervais, F., Moukhsil, A., Augland, L. E. & Crowley, J. L. Déformations tardi-grenvilliennes dans la ceinture parautochtone (province de grenville centrale): Contraintes géochronologiques par couplage de méthodes U-Pb de haute résolution spatiale et de haute précision. *Can. J. Earth Sci.* **55**, 406–435 (2018).

Jordan, S., Indares, A., Dunning, G. Partial melting of metapelites in the Gagnon terrane below the high-pressure belt in the Manicouagan area (Grenville Province): Pressure-temperature (P-T) and U-Pb age constraints and implications. *Can. J. Earth Sci.* **43**, 1309-1329 (2006)

Krogh, T. Precise U-Pb ages for Grenvillian and pre-Grenvillian thrusting of Proterozoic and Archean metamorphic assemblages in the Grenville Front tectonic zone, Canada. *Tectonics*. **13**, 963-982 (1994)

Lambert, C., Gervais, F., Moukhsil, A., Crowley, J. L. & Bonnet, A. L. *Reconstruire l’architecture de l’ouest de la Province de Grenville, Québec : résultats préliminaires de la cartographie, de l’analyse cinématique et de la géochronologie*. (2019).

Lambert, C. W., Gervais, F., Crowley, J. L. & Moukhsil, A. Evidence for extensive melt-present deformation and dismembering of the overlying allochthonous crust during late-grenvillian orogenic flow. in *Geological Society of America Abstracts with Programs* **52**, (Geological Society of America, 2020).

Lasalle, S., Dunning, G., Indares, A. In situ LA-ICP-MS dating of monazite from aluminous gneisses: Insights on the tectono-metamorphic history of a granulite-facies domain in the central Grenville Province. *Canadian Journal of Earth Sciences*. **51**, 558-572 (2014)

Marcantonio, F., Mcnutt, R. H., Dickin, A. P., Heaman, L. M. Isotopic evidence for the crustal evolution of the Frontenac Arch in the Grenville Province of Ontario, Canada. *Chemical Geology*. **83**, 297-314 (1990)

Marsh, J. H. & Culshaw, N. G. Timing and conditions of high-pressure metamorphism in the western Grenville Province: Constraints from accessory mineral composition and phase equilibrium modeling. *Lithos* **200**–**201**, 402–417 (2014).

Maity, B. & Indares, A. The Geon 14 arc-related mafic rocks from the central Grenville Province. *Can. J. Earth Sci.* **55**, 545–570 (2018).

Maity, B. Origin of mafic and potassic to ultrapotassic rocks, Manicouagan area, central Grenville Province: geochemical and geochronological constraints on the evolution of the Mesoproterozoic SE Laurentian margin and the Grenvillian LHO. Diss. Memorial University of Newfoundland, (2019).

McCarron, T., Gaidies, F., Mcfarlane, C., Eastin, R., Jones, P. Coupling thermodynamic modeling and high-resolution in situ LA-ICP-MS monazite geochronology: evidence for Barrovian metamorphism late in the Grenvillian history of southeastern Ontario. *Mineralogy and Petrology*. **108**, 741-758 (2014).

McLelland, J. M., Selleck, B. W. & Bickford, M. E. Review of the Proterozoic evolution of the Grenville Province, its Adirondack outlier, and the Mesoproterozoic inliers of the Appalachians. *Mem. Geol. Soc. Am.* **206**, 21–49 (2010).

Mcnutt, R. H. & Dickin, A. P. A comparision of Nd model ages and U-Pb zircon ages of Grenville granitoids: constraints on the evolution of the Laurentian margin from 1.5 to 1.0 Ga. *Terra Nova*. **24**, 7-15 (2012).

Mezger, K., Van Der Plujim, B., Essene, E., Halliday, A. Synorogenic collapse: A perspective from the middle crust, the Proterozoic Grenville orogen*. Science*. **254**, 695-698 (1991)

Moretton, K. & Dickin, A.P. Nd isotope mapping of the Dysart gneiss complex: Evidence for a rifted block within the Central Metasedimentary Belt of the Grenville Province. *Precambrian Research*. **228**, 223-232 (2013).

Moukhsil, A., Lacoste, P., Gobeil, A. & David, J. Synthèse géologique de la région de Baie-Comeau (SNRC 22F). MERN; RG 2009 03, 29 p, (2009)

Moukhsil, S., Solgadi, F. Géologie, potentiel minéral et cadre géodynamique des roches de la région du Réservoir Daniel-Johnson (Manicouagan), partie centrale de la Province de Grenville. . Ministère de l’Énergie et des Ressources naturelles, Québec; RG, 7-92 (2017)

Moukhsil, A., Solgadi, F., Belkacim, S., Elbasbas., Augland,L.E. Géologie de la région du lac Okaopéo, Côte-Nord. Ministère de l’Énergie et des Ressources naturelles, Québec; RG 2014-03, 34 pages (2014)

Moukhsil, A. Solgadi, F. Belkacim, S., Augland, L. R. & David, J. Géologie de la région de Parent, Haut-Saint-Maurice (Partie ouest du Grenville). MERN, 62 p (2015).

Moukhsil, A. Solgadi, F. Clark, T. Blouin, S., Indares, A.& Davis, D.W. Géologie du nord-ouest de la région du barrage Daniel-Johnson (Manic 5), Côte-Nord. MERN; RG 2013 01, 44 p (2013b).

Moukhsil, A., Solgadi, F., Indares, A. & Belkacim. S. Géologie de la région septentrionale du réservoir aux Outardes 4, Côte-Nord. MERN, RG 2013 0 (2013)

Papapavlou, K. U‐Pb geochronology report. Grenville 2018‐2019. MERN MB 2019-11 (2019).

Papapavlou, k., Moukhsil, A., Côté, G. & Poirier, P. U-Pb Geochronology of Zircon by LA-ICPMS in samples from the Grenville Province (La Tuque Area, Quebec), MERN, MB 2018-35 (2018)

Peck, W. H. *et al.* Orogenic to postorogenic (1.20-1.15 Ga) magmatism in the Adirondack Lowlands and Frontenac terrane, southern Grenville Province, USA and Canada. *Geosphere* **9**, 1637–1663 (2013).

Rivers, T. Lithotectonic elements of the Grenville Province: Review and tectonic implications. *Precambrian Res.* **86**, 117–154 (1997).

Rivers, T. Assembly and preservation of lower, mid, and upper orogenic crust in the Grenville Province-Implications for the evolution of large hot long-duration orogens. *Precambrian Res.* **167**, 237–259 (2008).

Rivers, T. The Grenville Province as a large hot long-duration collisional orogen – insights from the spatial and thermal evolution of its orogenic fronts. *Geol. Soc. London, Spec. Publ.* **327**, 405–444 (2009).

Rivers, T. Upper-crustal orogenic lid and mid-crustal core complexes: Signature of a collapsed orogenic plateau in the hinterland of the Grenville Province. *Can. J. Earth Sci.* **49**, 1–42 (2012).

Rivers, T. *et al.* The Grenville Orogen — A post-LITHOPROBE perspective. in *Tectonic Styles in Canada: The LITHOPROBE Perspective.* (eds. Percival, J. A., Cook, F. A. & Clowes, R. .) 97–236 (2012).

Sappin, A.-A., Constantin, M. & Clark, T. Petrology of mafic and ultramafic intrusions from the Portneuf–Mauricie Domain, Grenville Province, Canada: Implications for plutonic complexes in a Proterozoic island arc. *Lithos* **154**, 277–295 (2012).

Slagstad, T., Culshaw, N.G., Jamieson, R.A., Ketchum, J.W.F. Early Mesoproterozoic tectonic history of the southwestern Grenville Province, Ontario: Constraints from geochemistry and geochronology of high-grade gneisses. *Geological Society of America Memoir*, **197**: 209-241. (2004)

Smith, T. E. & Harris, M. J. The Queensborough mafic-ultramafic complex: A fragment of a Meso-Proterozoic ophiolite? Grenville Province, Canada. *Tectonophysics* **265**, 53–82 (1996).

Soucy La Roche, R., Gervais, F., Tremblay, A., Crowley, J. L. & Ruffet, G. Tectono-metamorphic history of the eastern Taureau shear zone, Mauricie area, Québec: Implications for the exhumation of the mid-crust in the Grenville Province. *Precambrian Res.* **257**, 22–46 (2015).

Valverde Cardenas, C. Geochemical constraints on the origin of mafic and ultrapotassic dykes from the southern Manicouagan area, Grenville Province. *Masters Thesis*. Memorial University of Newfoundland. (2009)

Valverde Cardenas, C., Indares, A., Jenner, G. Mafic and ultrapotassic rocks from the Canyon domain (central Grenville Province): geochemistry and tectonic implications*. Canadian Journal of Earth Sciences*, 49: 412-433. (2012)

Zelek, M. & Dickin, A. P. Nd Isotope Mapping of Crustal Terranes in the Parent-Clova Area, Quebec: Implications for the Evolution of the Laurentian Margin in the Central Grenville Province. *Geoscience*. **v3 n3**, 448-465 (2013)
